# Supplementary material
Source: PubMed Central journal article supplement (PMC6310668)
Supplement: NIHMS988919-supplement-etable_3.pdf [file NIHMS988919-supplement-etable_3.pdf]

**eTable 3.** Graphical causal model. Detailed statistical report for the causal graphical model analysis. Significant parameter estimates, which correspond to the edges in Figure 4, are highlighted with an ‘\*’. (Abbreviations: Par. Est.: parameter estimate; SE: standard error; T: *t* statistic; p: *p*-value.)

| <b>Connection</b>                   |                           | <b>Par. Est.</b> | <b>SE</b>    | <b>T</b>      | <b>P</b>          |
|-------------------------------------|---------------------------|------------------|--------------|---------------|-------------------|
| COVAR c1 (age/sex)                  | EEG c1 ( $\alpha$ )       | -0.362           | 0.295        | -1.230        | 0.242             |
| COVAR c1 (age/sex)                  | EEG c2 ( $\delta$ mean)   | 0.388            | 0.306        | 1.270         | 0.228             |
| COVAR c1 (age/sex)                  | EEG c3 ( $\delta$ var)    | -0.264           | 0.313        | -0.845        | 0.415             |
| <b>COVAR c1 (age/sex)</b>           | <b>MRI c1 (frn-par)</b>   | <b>0.791</b>     | <b>0.179</b> | <b>4.424</b>  | <b>&lt;0.001*</b> |
| COVAR c1 (age/sex)                  | MRI c1 (tmp-occ)          | 0.139            | 0.271        | 0.513         | 0.617             |
| COVAR c2 (exp vars)                 | EEG c1 ( $\alpha$ )       | -0.128           | 0.295        | -0.434        | 0.672             |
| COVAR c2 (exp vars)                 | EEG c2 ( $\delta$ mean)   | 0.078            | 0.306        | 0.255         | 0.803             |
| COVAR c2 (exp vars)                 | EEG c3 ( $\delta$ var)    | 0.222            | 0.313        | 0.712         | 0.490             |
| COVAR c2 (exp vars)                 | MRI c1 (frn-par)          | 0.072            | 0.147        | 0.490         | 0.633             |
| <b>COVAR c2 (exp vars)</b>          | <b>MRI c1 (tmp-occ)</b>   | <b>-0.824</b>    | <b>0.223</b> | <b>-3.688</b> | <b>0.003*</b>     |
| COVAR c3 (sed)                      | EEG c1 ( $\alpha$ )       | 0.268            | 0.295        | 0.911         | 0.380             |
| COVAR c3 (sed)                      | EEG c2 ( $\delta$ mean)   | -0.053           | 0.306        | -0.174        | 0.865             |
| COVAR c3 (sed)                      | EEG c3 ( $\delta$ var)    | 0.044            | 0.313        | 0.141         | 0.890             |
| COVAR c3 (sed)                      | MRI c1 (frn-par)          | -0.032           | 0.150        | -0.216        | 0.832             |
| COVAR c3 (sed)                      | MRI c1 (tmp-occ)          | -0.114           | 0.227        | -0.502        | 0.625             |
| <b>EEG c1 (<math>\alpha</math>)</b> | <b>GOS-E<sub>6m</sub></b> | <b>1.015</b>     | <b>0.310</b> | <b>3.271</b>  | <b>0.007*</b>     |
| EEG c1 ( $\alpha$ )                 | MRI c1 (frn-par)          | -0.299           | 0.165        | -1.810        | 0.095             |
| EEG c1 ( $\alpha$ )                 | MRI c1 (tmp-occ)          | -0.002           | 0.250        | -0.007        | 0.994             |
| EEG c2 ( $\delta$ mean)             | GOS-E <sub>6m</sub>       | -0.526           | 0.243        | -2.168        | 0.051             |
| EEG c2 ( $\delta$ mean)             | MRI c1 (frn-par)          | -0.184           | 0.159        | -1.155        | 0.271             |

| <b>Connection</b>                       |                           | <b>Par. Est.</b> | <b>SE</b>    | <b>T</b>      | <b>P</b>      |
|-----------------------------------------|---------------------------|------------------|--------------|---------------|---------------|
| EEG c2 ( $\delta$ mean)                 | MRI c1 (tmp-occ)          | -0.069           | 0.241        | -0.287        | 0.779         |
| <b>EEG c3 (<math>\delta</math> var)</b> | <b>GOS-E<sub>6m</sub></b> | <b>-0.813</b>    | <b>0.267</b> | <b>-3.041</b> | <b>0.010*</b> |
| <b>EEG c3 (<math>\delta</math> var)</b> | <b>MRI c1 (frn-par)</b>   | <b>0.503</b>     | <b>0.153</b> | <b>3.282</b>  | <b>0.007*</b> |
| EEG c3 ( $\delta$ var)                  | MRI c1 (tmp-occ)          | 0.465            | 0.232        | 2.002         | 0.068         |
| MRI c1 (frn-par)                        | GOS-E <sub>6m</sub>       | 0.052            | 0.330        | 0.159         | 0.877         |
| <b>MRI c1 (tmp-occ)</b>                 | <b>GOS-E<sub>6m</sub></b> | <b>0.726</b>     | <b>0.247</b> | <b>2.940</b>  | <b>0.012*</b> |
